# Supplementary material for: Ischemic-hypoxic preconditioning enhances the mitochondrial function recovery of transplanted olfactory mucosa mesenchymal stem cells via miR-181a signaling in ischemic stroke
Source: publisher site journal article supplement (doi:10.18632/aging.202807), 2021-04-04
Supplement: Supplementary file [file aging-v13i8-202807-supplementary-material-SD1.pdf]

## SUPPLEMENTARY FIGURES

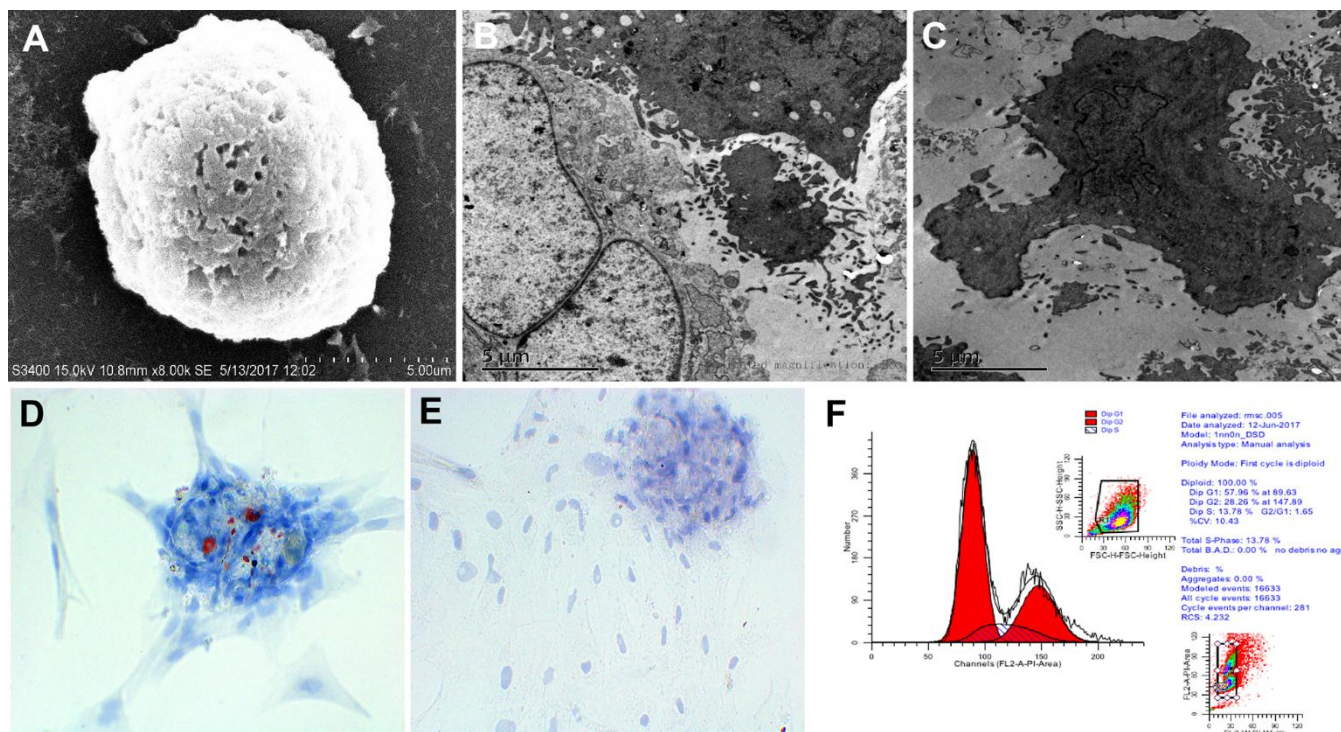

**Supplementary Figure 1. Biological characteristics of OM-MSCs.** (A) The surface of OM-MSCs were observed by scanning electron microscope. (B, C) Ultrastructure of the cells were observed by transmission electron microscopy (TEM). (D) OM-MSCs induced by a lipogenic inducer were stained with Oil Red O. (E) OM-MSCs induced by an osteogenic inducer were stained with alizarin red. (F) The cell cycle detected by flow cytometry.

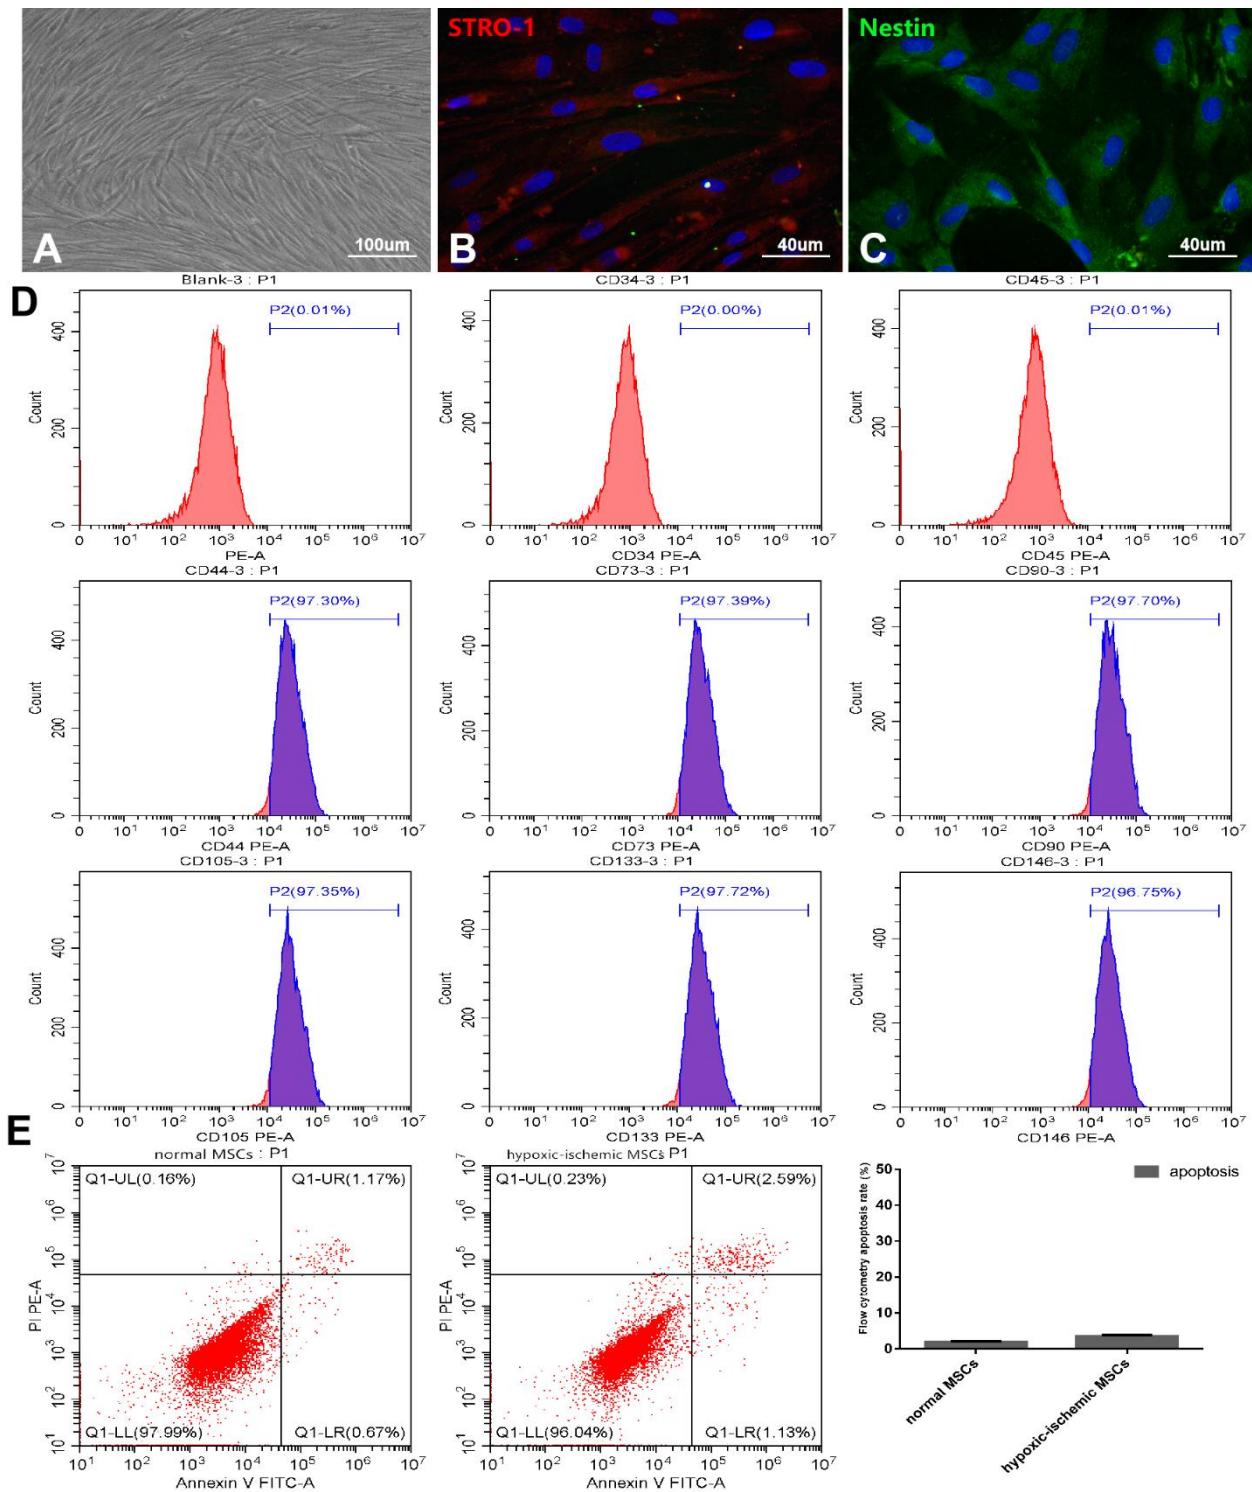

**Supplementary Figure 2. Cell specific markers and apoptosis rates were compared between IhOM-MSCs and OM-MSCs. (A)** IhOM-MSCs were mainly exhibited spindle-shaped and a radial arrangement under light microscope. **(B, C)** The specific markers STRO-1 and Nestin of IhOM-MSCs were identified by immunofluorescence. **(D)** The surface markers and purity of IhOM-MSCs were detected by flow cytometry assay. **(E)** The apoptosis rate of both cells as evaluated by flow cytometry with Annexin V/PI staining.

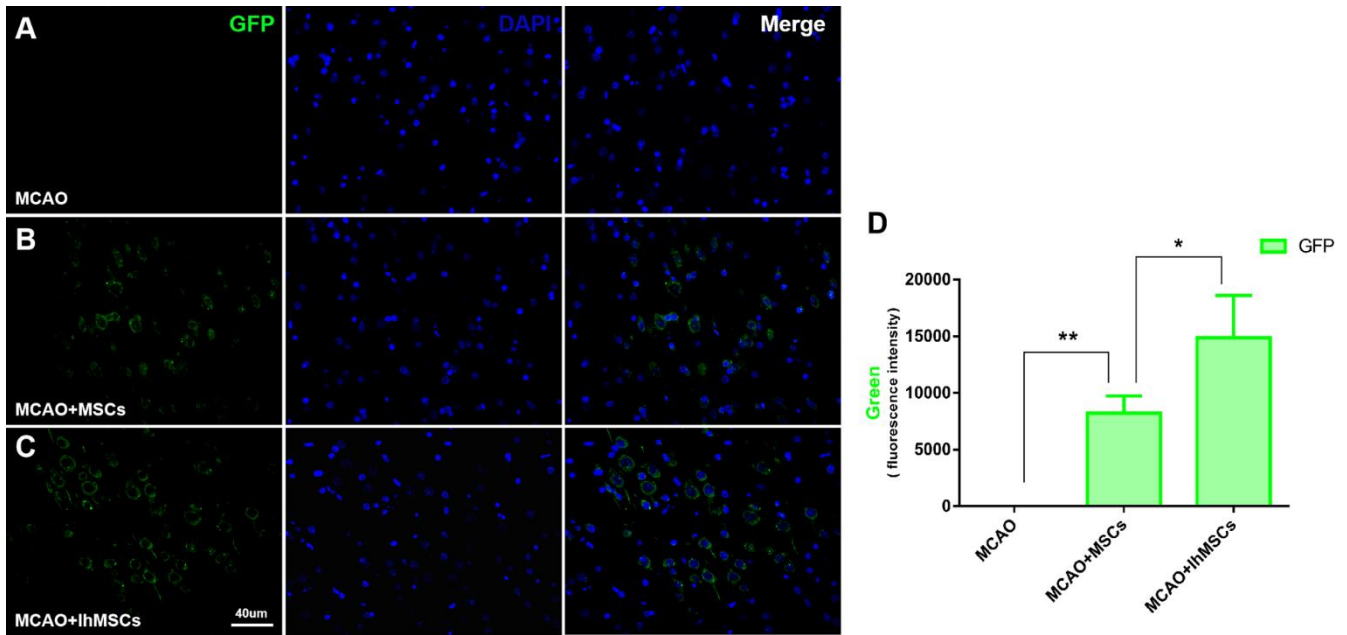

**Supplementary Figure 3. NEW-OM-MSCs could migrate to the infarction area through the blood-brain barrier after transplantation.** (A) No GFP-positive cells were found in MCAO group. (B) GFP-positive cells were found in MCAO+MSCs group. (C) The number of GFP-positive cells was significantly increased in the MCAO+lhMSCs group compared with the MCAO+MSCs. (D) Histogram of the number of GFP positive cells in each group. (OM-MSCs were replaced by MSCs in the figure. All data are presented as the mean value  $\pm$  SD. \* $p < 0.05$ , \*\* $p < 0.01$ ).
